# Supplementary material for: Efficient and tunable multi-color and white light Ln-MOFs with high luminescence quantum yields
Source: Royal Society of Chemistry journal article supplement (doi:10.1039/c5ra03710g), 2015-01-01
Supplement: c5ra03710g1.pdf [file c5ra03710g1.pdf]

## Supporting Information

### **Efficient and tunable multi-color and white light Ln-MOFs with high luminescent quantum yields**

Shuzhi Zou,<sup>a, b</sup> Qipeng Li,<sup>a, b</sup> and Shaowu Du<sup>a\*</sup>

<sup>a</sup> *State Key Laboratory of Structural Chemistry, Fujian Institute of Research on the Structure of Matter, Chinese Academy of Sciences, Fuzhou, Fujian 350002, P. R. China.*

<sup>b</sup> *Graduate University of Chinese Academy of Sciences, Beijing 100039, P. R. China.*

\*Corresponding author, E-mail: swdu@fjirsm.ac.cn. Fax: 86-591-83709470.

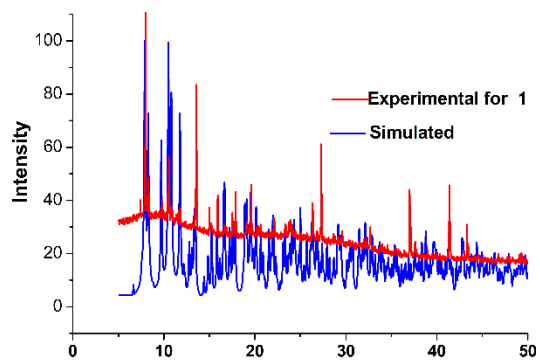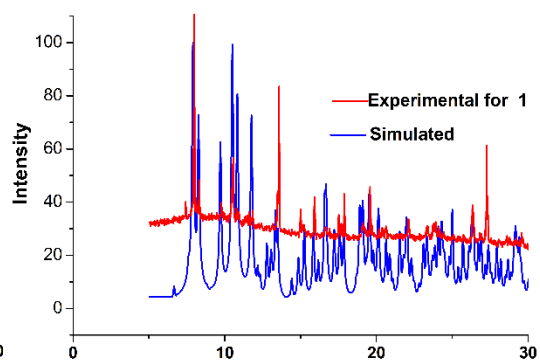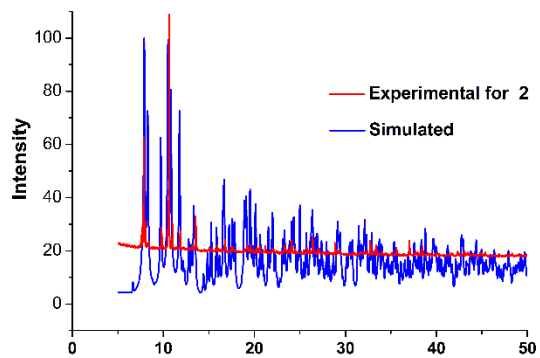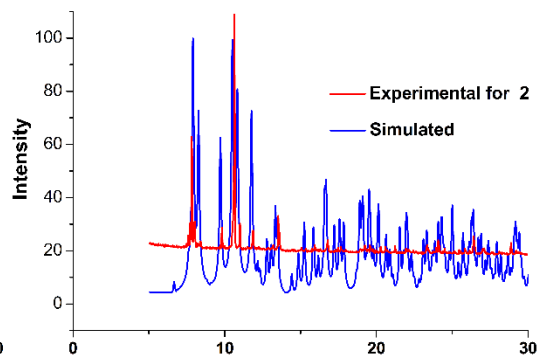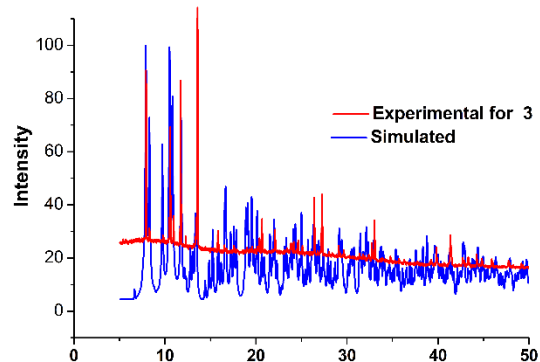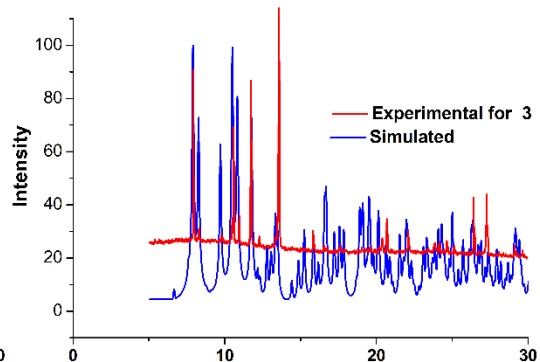

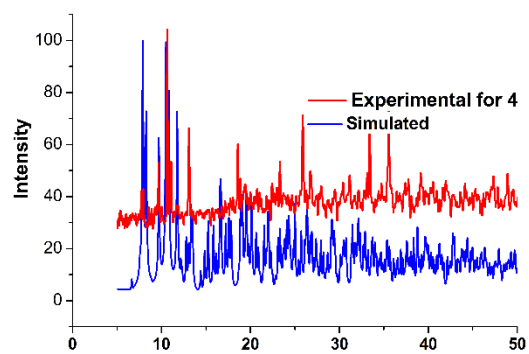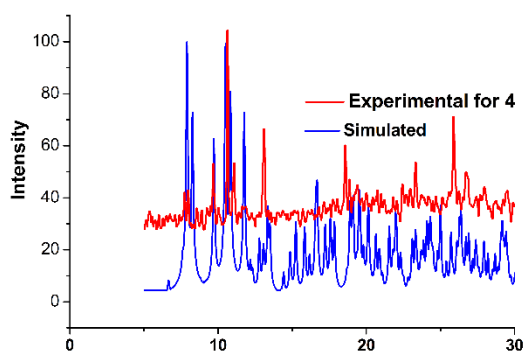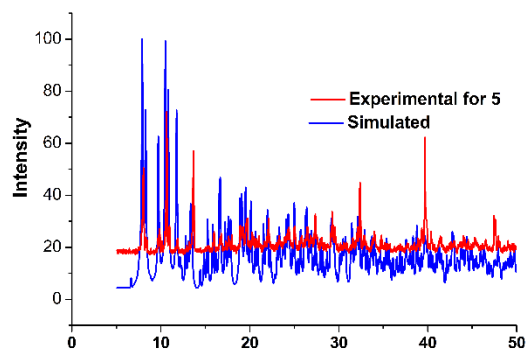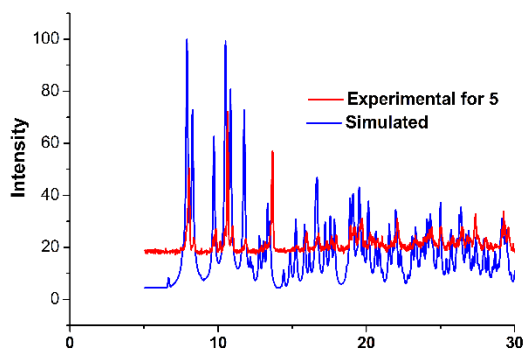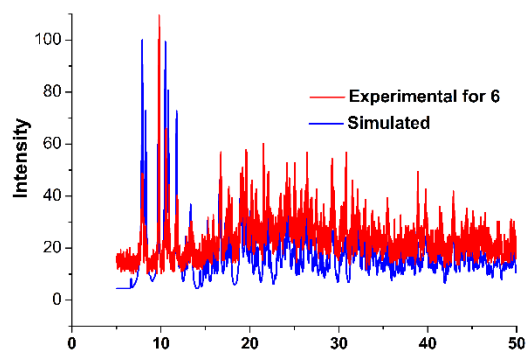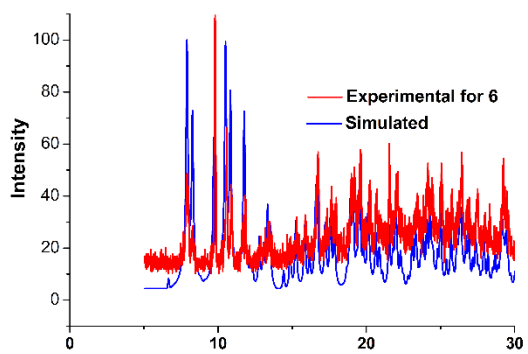

$2\theta$

$2\theta$

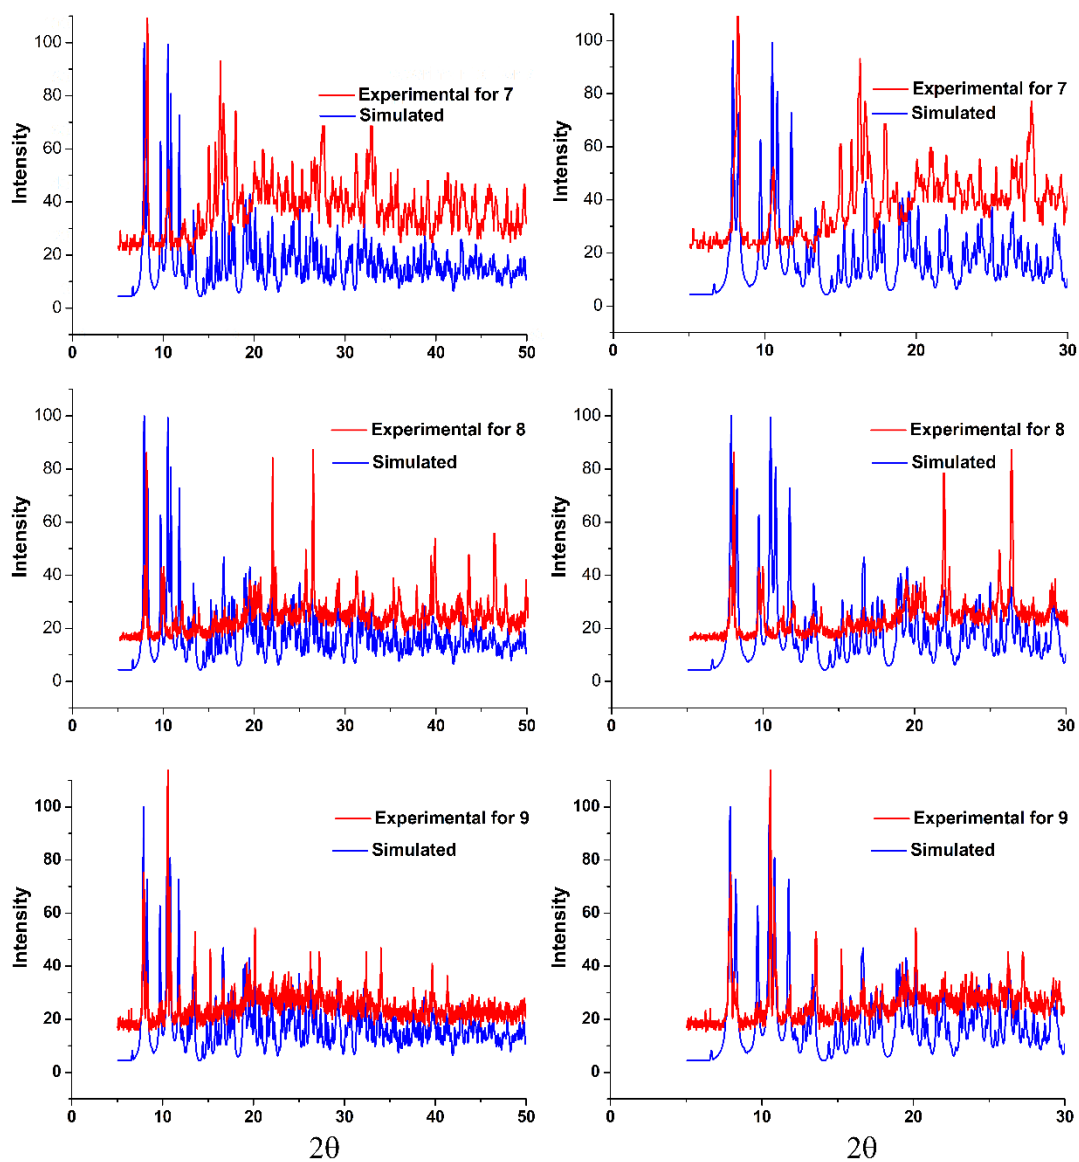

**Fig. S1** Powder XRD patterns (top, red) and simulated patterns (bottom, blue) of compounds **1–9**(left, 0-50 degree, right, 0-30 degree).

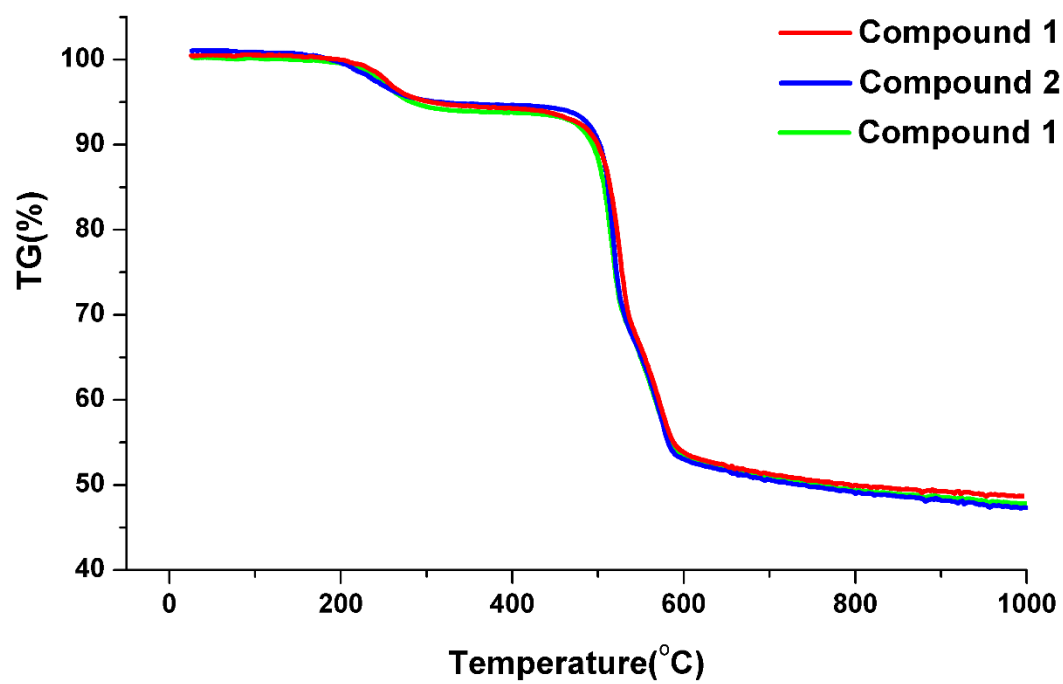

**Fig. S2** TGA curves of compounds 1–3.

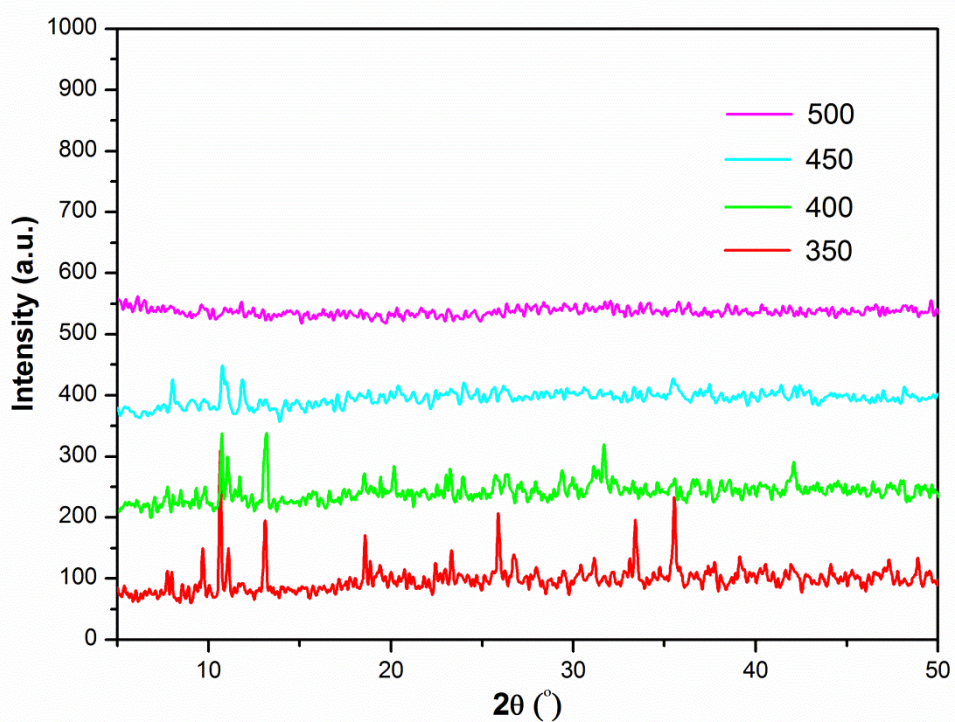

**Fig. S3** Variable temperature XRD spectra for compound 1.

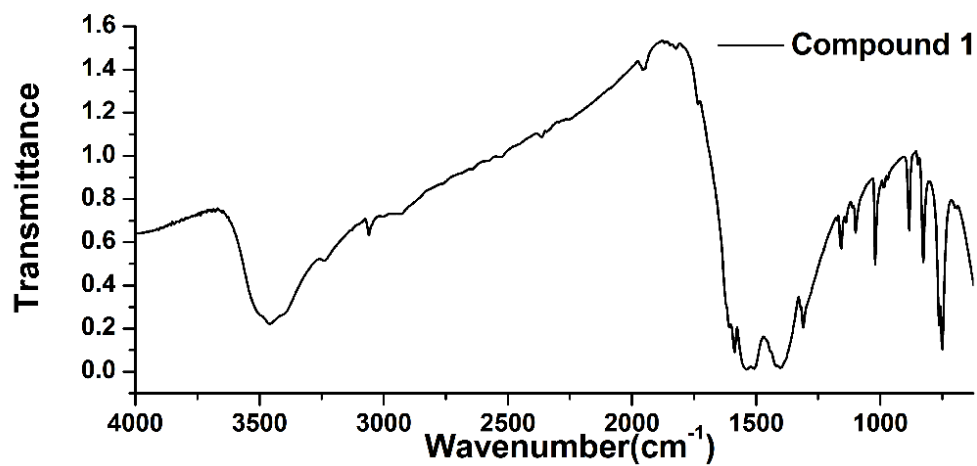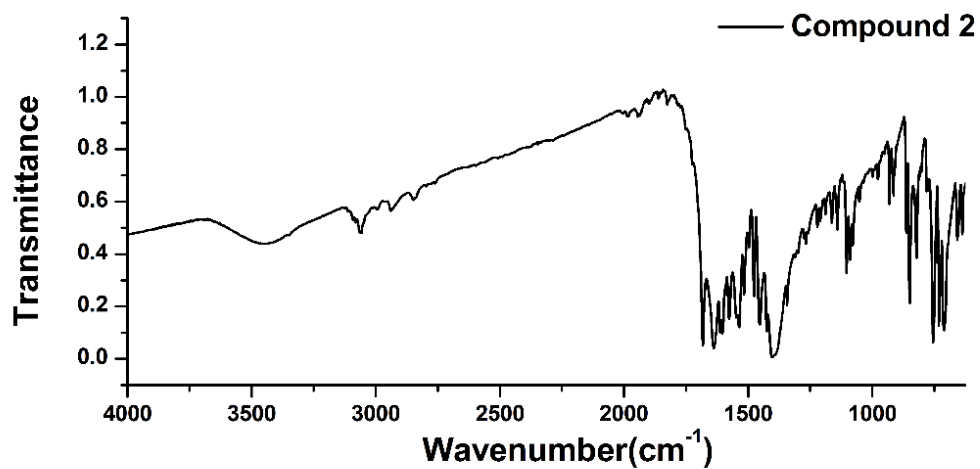

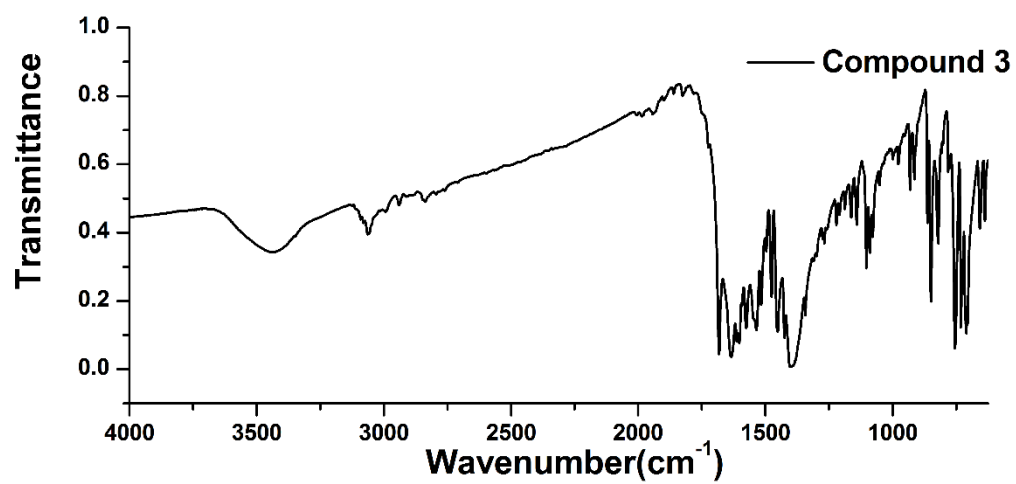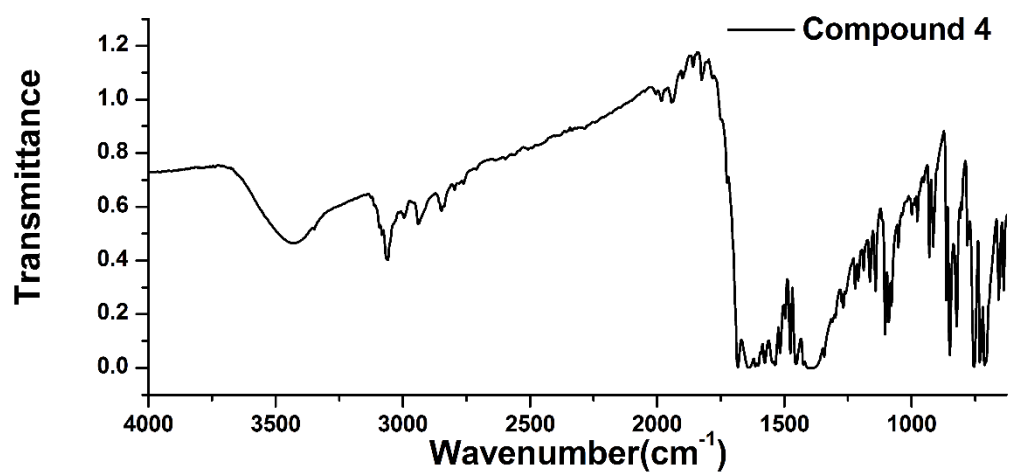

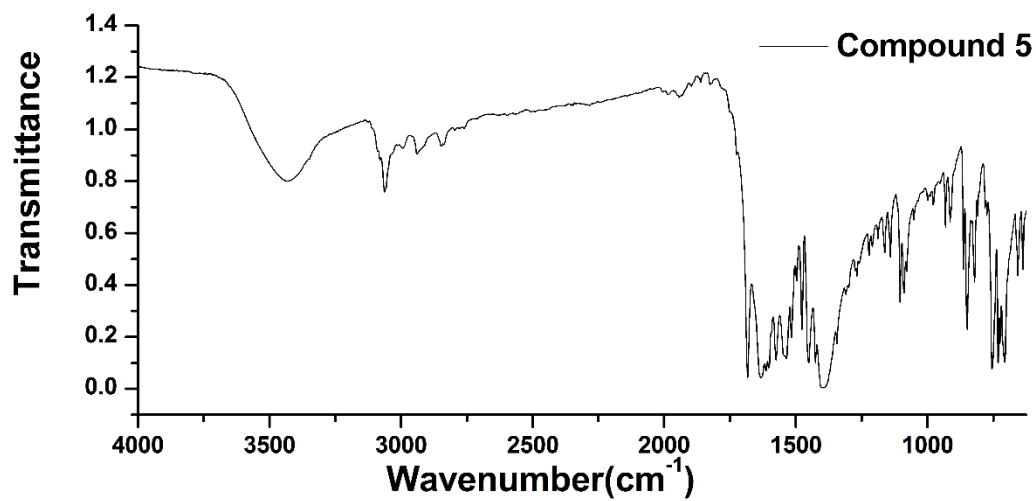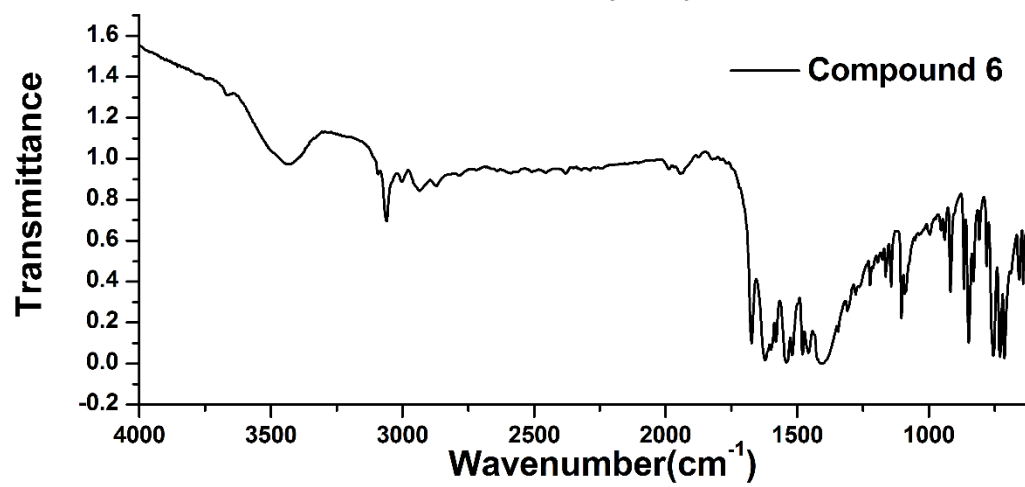



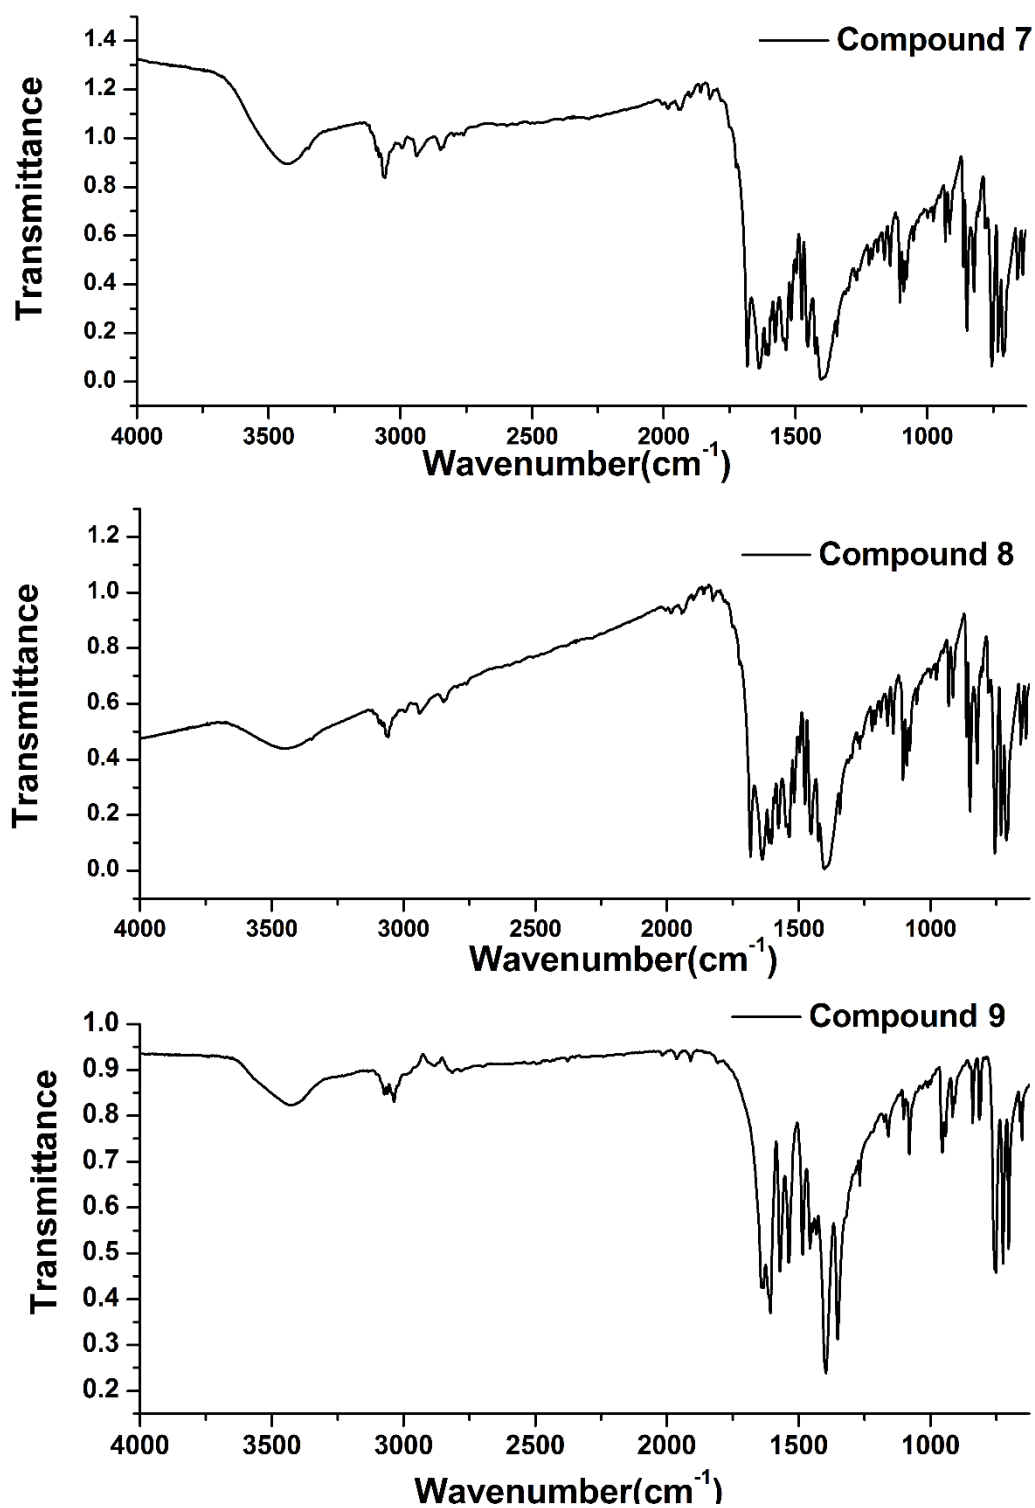

Fig. S4 IR spectra of compounds 1–9.

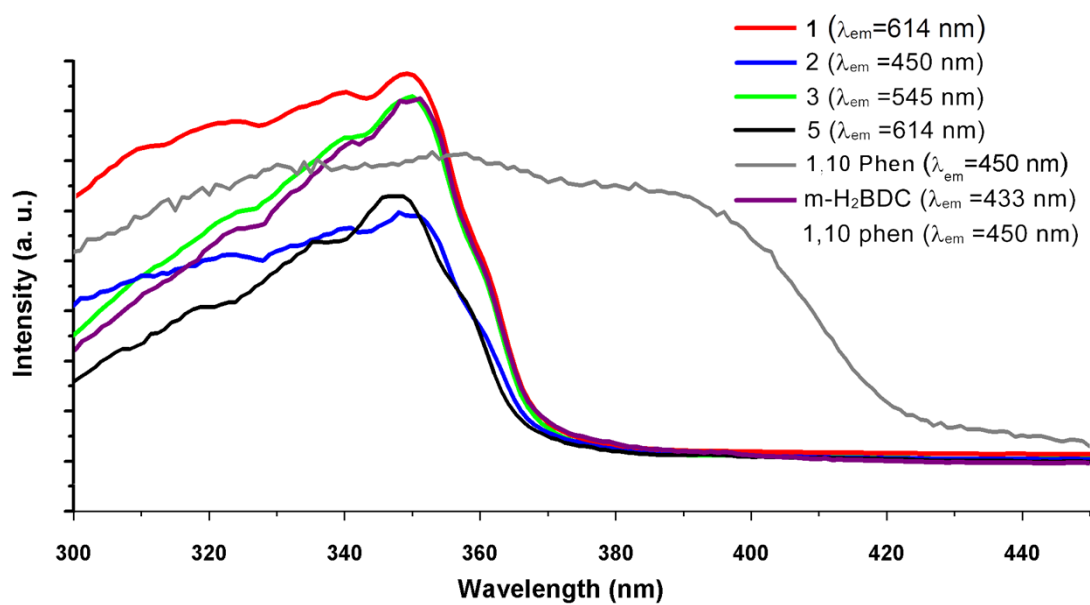

**Fig. S5** Excitation spectra of compounds **1–3**, **5** and ligands *m*-H<sub>2</sub>BDC and Phen.
